# Supplementary material for: Dual Independent Roles of the p24 Complex in Selectivity of Secretory Cargo Export from the Endoplasmic Reticulum
Source: MDPI journal article supplement (doi:10.3390/cells9051295), 2020-05-22
Supplement: s1 [file s1]

-Article

# Dual independent roles of the p24 complex in selectivity of secretory cargo export from the endoplasmic reticulum

Sergio Lopez <sup>1,3</sup>, Ana Maria Perez-Linero <sup>1</sup>, Javier Manzano-López <sup>1</sup>, Susana Sabido-Bozo <sup>1,3</sup>, Alejandro Cortes-Garcia <sup>1,3</sup>, Sofia Rodriguez-Gallardo <sup>1,3</sup>, Auxiliadora Aguilera-Romero <sup>1,3</sup>, Veit Goder <sup>2</sup> and Manuel Muñiz <sup>1,3,\*</sup>

<sup>1</sup> Department of Cell Biology, University of Seville, 41012 Seville, Spain

<sup>2</sup> Department of Genetics, University of Seville, 41012 Seville, Spain

<sup>3</sup> Instituto de Biomedicina de Sevilla (IBiS), Hospital Universitario Virgen del Rocío/CSIC/Universidad de Sevilla, 41012 Seville, Spain

\* Correspondence: mmuniz@us.es

## Supplementary data

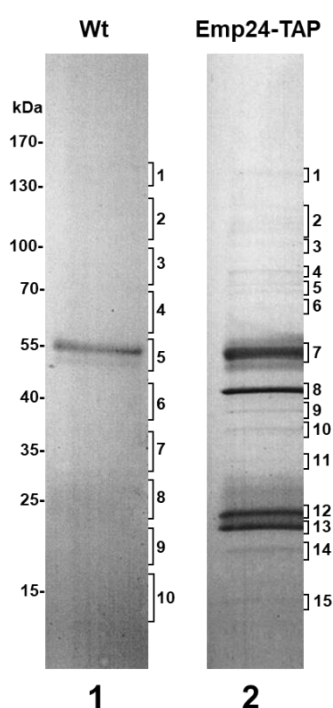

**Figure S1.** Mass spectrometry analysis of Emp24-TAP interactors. Enriched ER membrane fractions of wild-type yeast cells or cells expressing Emp24-TAP were isolated and solubilized with 1% digitonin. The extract was incubated with IgG-coupled magnetic beads and co-precipitated proteins were analyzed by SDS-PAGE and Coomassie Blue staining. Visualized bands (lane 2) and regions from the control reaction (lane 1) were numbered, cut out, subjected to in-gel digestion with trypsin and their protein content determined by LC-MS/MS techniques (Supplementary material Table S1, S2 and S3)

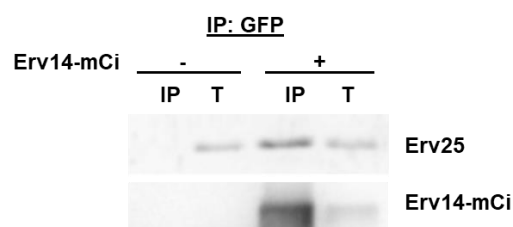

**Figure S2.** The p24 complex member Erv25 associates with the cargo receptor Erv14. Co-immunoprecipitation assay between Erv14-mCi and Erv25. Enriched ER membrane fractions of wild-type cells with or without expressing Erv14-mCi were solubilized, and immunoprecipitated (IP) with anti-GFP antibody, followed by immunoblotting with anti-Erv25 and anti-GFP antibodies. T represents a 0.5% of the solubilized input material.

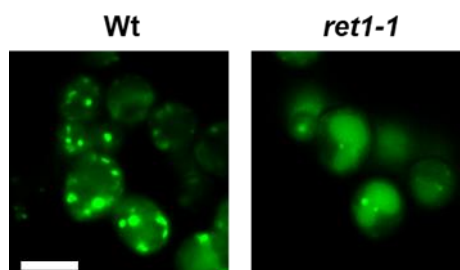

**Figure S3.** The thermosensitive *ret1-1* mutation impairs the Golgi-ER retrograde transport at restrictive temperature. Live images of wild-type and *ret1-1* cells expressing the recycling receptor Rer1-GFP at 37°C. In wild-type, Rer1-GFP showed the typical dotted Golgi pattern, whereas in *ret1-1*, it was mainly localized at the vacuole, indicating a defective retrograde transport. Scale bar, 5  $\mu$ m.

**Table S1.** Description of proteins identified by LCQ Deca XP Plus in Emp24-TAP samples by 2 or more peptides,

**Table S2.** Peptides identified in emp24-TAP and control samples analyzed by LCQ XP Plus analysis.
